# Supplementary material for: “The Ability to Go Out into the World Is the Most Important Thing”—A Qualitative Study of Important Exercise Outcomes for People with Lung Cancer
Source: MDPI journal article supplement (doi:10.3390/curroncol31020054), 2024-01-29
Supplement: s1 [file s1]

## **Supplementary Materials**

### **Section S1: Question Guide**

#### **Introduction**

Introduction, welcome to country, introduction of facilitators, and housekeeping.

#### **Consent**

Verbal consent sought from participant(s) to commence recording. Reminder that once we start recording we will ask each if they give consent to being included in the study. (**Start recording**). Verbal consent to participate in study confirmed.

#### **Further introduction and definition on outcome measures**

*The overarching aim of this interview is to hear about your experiences, opinions and priorities regarding outcome measures (and I will go over than in a second) and that could be prior to, during and following exercise pre- and rehabilitation programs.*

An outcome measure is a broad term – referring to any assessment that can be used to measure your current level of health, function or movement. Examples of outcome measures are: measuring blood pressure, assessing physical tasks like walking or answering questions about symptoms, experiences or feelings.

An outcome measure may be collected prior to starting, during or after exercise. An outcome measure can help exercise professionals decide if and what exercise is safe for a person to complete, and, can help exercise professionals understand what each person needs during the program and to see if things change during the program.

Some of you may have completed an exercise program (or the person you care for may have) after being diagnosed with lung cancer- if that is the case we encourage you to draw on your experiences. It may also be the case that you or the person you care for has not yet been involved in an exercise program. If this is your situation we would like you to think about the reasons that might make you decide to start exercising during your lung cancer journey.

### **Section S1.1 – Physical activity**

#### **Seeding question:**

1a. Following the initial diagnosis with lung cancer, were there activities or physical tasks that you found difficult as someone diagnosed with lung cancer, or as a carer of someone with lung cancer what was your perception of what was difficult?

#### **Additional background and focused question:**

Background: Exercise staff often measure things like strength and/or fitness. An example of a strength test may be lifting a heavy weight, or testing you standing up and sitting down from a chair. An example of a fitness test could be a walking test or an activity that makes you feel breathless. (end slide)

1b. 'Which physical measures are important to you?

*Prompts: Why is that?*

1c. Are there other physical aspects you have difficulty with that you think exercise staff should measure before, during, or after exercise?

## **Section S1.2 Body structure and function**

### **Seeding questions:**

2a. What symptoms did you experience as a result of your lung cancer or treatment?

### **Additional background and focused question:**

Background: As we mentioned earlier - Exercise professionals may ask a single question or series of questions to gather information. Questions can ask about symptoms, feelings or experiences. This may be in the form of a single question where you rate a single symptom or a questionnaire where you are asked to rate multiple things over a set period of time on a scale as you see in the pictures.

2b. Thinking about what is important to you, which of your symptoms do you think that exercise professionals should measure before, during or after exercise?

2c. Are there any other symptoms or feelings which could affect your ability to exercise that we have not discussed?

## **Section S1.3 Participation**

### **Focused Questions:**

3a. Lung cancer can impact on people's quality life – this means affecting your ability to participate in tasks and activities that are important to them such as looking after yourself or completing daily activities.

Thinking about what is important to you, what do you think exercise staff should ask about when it comes to self care and Daily tasks?

3b. *Quality of life can also include a persons ability to participate in hobbies, work or activities that connect them with family, friends and the community - what is important to you in relation to these activities?*

3c. *is there anything else you feel contributed to your quality of life that we have not discussed?*

3d. What changes were or would be most important to you to feel like exercise sessions were helping you?

#### **Section S1.4: Telehealth**

##### **Background and focused question**

So, we would now like to briefly talk about telehealth. Telehealth refers to an appointment with a healthcare provider by phone or video call. To give you an idea of what a telehealth appointments like – so here you can see what it looks like

4a. Have you had any experiences completing a test or physical assessment during a telehealth appointment in your home environment?

Prompt: if unsure how this would practically work. This may include sitting up and down in a chair or walking up and down a corridor in your home.

*Prompt: (if extra time) can you describe what it was like to do those tests via telehealth?*

4b. Would you feel comfortable completing exercise tests during a telehealth appointment like in the pictures?

4c. How confident are you with completing questionnaires from a link in an e-mail on a secure website?

##### **Section S1.5: Closing question**

To close our session together:

5. Is there anything we have not discussed today that you feel is an important measure of change during or following an exercise program?

**Thank participants and close session.**

Figure S1: ICF framework domains, chapters, and outcomes.

| Chapter name                                 | First Level                                  |          | Second Level                                   |          |
|----------------------------------------------|----------------------------------------------|----------|------------------------------------------------|----------|
|                                              | ICF outcome                                  | ICF code | ICF Outcome                                    | ICF code |
| Learning and applying knowledge              | Learning and applying knowledge, unspecified | D199     |                                                |          |
| General tasks and demands                    | Undertaking a multiple tasks                 | D210     |                                                |          |
|                                              | Carrying out daily routine                   | D230     |                                                |          |
| Mobility                                     | Changing basic body position                 | D410     | Sitting                                        | D4103    |
|                                              | Changing basic body position                 | D410     | Standing                                       | D4104    |
|                                              | Transferring oneself                         | D420     | Transferring oneself one sitting               | D4200    |
|                                              | Lifting and carrying objects                 | D430     | Lifting                                        | D4300    |
|                                              |                                              |          | Carrying in the hands                          | D4301    |
|                                              |                                              |          | Carrying in the arms                           | D4302    |
|                                              | Walking                                      | D450     | Walking short distances                        | D4500    |
|                                              |                                              |          | Walking long distances                         | D4501    |
|                                              | Moving around                                | D455     | Climbing                                       | D4551    |
|                                              |                                              |          | Running                                        | D4552    |
|                                              | Moving around in different locations         | D460     | Moving around within the home                  | D4600    |
|                                              |                                              |          | Moving around within buildings other than home | D4601    |
|                                              | Using transportation                         | D470     |                                                |          |
|                                              | Driving                                      | D475     |                                                |          |
| Self-Care                                    | Washing oneself                              | D510     |                                                |          |
|                                              | Looking after ones own health                | D570     |                                                |          |
| Domestic Life                                | Acquisition of goods and services            | D620     | Shopping                                       | D6200    |
|                                              | Preparing meals                              | D630     |                                                |          |
|                                              | Doing housework                              | D640     | garments                                       | D6400    |
|                                              | Caring for household objects                 | D650     | outdoors                                       | D6505    |
|                                              | Assisting others                             | D660     |                                                |          |
| Interpersonal interactions and relationships | Complex interpersonal connections            | D710     | Informal relationships with friends            | D7500    |
|                                              | Informal social relationships                | D750     |                                                |          |
|                                              | Family relationships                         | D760     | Parent-child relationships                     | D7600    |
| Major life areas                             | Reunerative employment                       | D850     |                                                |          |
| Community, social and civic life             |                                              |          |                                                |          |
|                                              | Recreation and leisure                       | D920     | Socializing                                    | D9205    |

### (a) Activities and Participation

| Chapter name                                                                           | First Level                                                         |          | Second Level                           |          |
|----------------------------------------------------------------------------------------|---------------------------------------------------------------------|----------|----------------------------------------|----------|
|                                                                                        | ICF outcome                                                         | ICF code | ICF Outcome                            | ICF code |
| Mental functions                                                                       | Energy and drive                                                    | B130     | Motivation                             | B1301    |
|                                                                                        |                                                                     |          | Appetite                               | B1302    |
|                                                                                        | Sleep functions                                                     | B135     |                                        |          |
|                                                                                        | Emotional functions                                                 | B152     | Regulation of emotions                 | B1521    |
| Sensory functions and pain                                                             | Higher-level cognitive functions                                    | B164     |                                        |          |
|                                                                                        | Taste function                                                      | B250     |                                        |          |
|                                                                                        | Touch function                                                      | B265     |                                        |          |
|                                                                                        | Sensation of pain                                                   | B280     |                                        |          |
| Functions of the cardiovascular, haematological, immunological and respiratory systems | Blood pressure functions                                            | B410     | Maintenance of blood pressure          | B402     |
|                                                                                        | Heart functions                                                     | B410     | Heart rate                             | B4100    |
|                                                                                        | Haematological system functions                                     | B430     | Oxygen-carrying functions of the blood | B4301    |
|                                                                                        | Respiratory functions                                               | B440     |                                        |          |
|                                                                                        | Respiratory muscle functions                                        | B445     |                                        |          |
|                                                                                        | Additional functions of the respiratory system                      | B450     |                                        |          |
|                                                                                        | Exercise tolerance functions                                        | B455     | Functions of coughing                  | B4501    |
|                                                                                        |                                                                     |          | General physical endurance             | B4550    |
|                                                                                        |                                                                     |          | Aerobic capacity                       | B4551    |
|                                                                                        |                                                                     |          | Fatiguability                          | B4552    |
| Functions of the digestive, metabolic and endocrine systems                            | Sensations associated with cardiovascular and respiratory functions | B460     |                                        |          |
|                                                                                        | Weight maintenance functions                                        | B530     |                                        |          |
|                                                                                        | Sensations associated with the digestive system                     | B535     |                                        |          |
| Neuromusculoskeletal and movement-related functions                                    | Muscle endurance functions                                          | B730     | Sensation of nausea                    | B5350    |
|                                                                                        | Muscle endurance functions                                          | B740     | Power of muscles of all limbs          | B7304    |
|                                                                                        |                                                                     |          | Endurance of muscle groups             | B7401    |

### (b)Body Functions

| Chapter name                   | First Level                                               |          | Second Level |          |
|--------------------------------|-----------------------------------------------------------|----------|--------------|----------|
|                                | ICF outcome                                               | ICF code | ICF Outcome  | ICF code |
| Structure of nervous system    | Structure of brain                                        | S110     |              |          |
| Structures related to movement | Additional musculoskeletal structures related to movement | S770     | Bones        | S7701    |
| Structures related to movement | Additional musculoskeletal structures related to movement | S770     | Muscles      | S7702    |

### (c) Body Structures

| Chapter name                   | First Level                                                                         |          | Second Level                                                                                |          |
|--------------------------------|-------------------------------------------------------------------------------------|----------|---------------------------------------------------------------------------------------------|----------|
|                                | ICF outcome                                                                         | ICF code | ICF Outcome                                                                                 | ICF code |
| Products and Technology        | Products or substance for personal consumption                                      | E110     | E1101 Drugs                                                                                 | E1101    |
|                                | Products and technology for personal indoor and outdoor mobility and transportation | E120     | General products and technology for personal indoor and outdoor mobility and transportation | e1200    |
| Support and relationships      | Immediate family                                                                    | E310     |                                                                                             |          |
|                                | Friends                                                                             | E320     |                                                                                             |          |
| Services, systems and policies | Health services, systems and policies                                               | E580     | Health systems                                                                              | e5801    |

### (d) Environmental Factors
